# Supplementary material for: Conversion of 5-[(4-nitrophenyl)azo]salicylate–metal complexes into nitrogen-doped nanoporous carbons for supercapacitor applications
Source: Royal Society of Chemistry journal article supplement (doi:10.1039/c4ra02902j), 2014-07-05
Supplement: c4ra02902j1.pdf [file c4ra02902j1.pdf]

## Electronic supplementary information

### 1. Electrochemical measurements employed in present work.

#### ➤ Measurements conducted in a three-electrode system using 6 mol L<sup>-1</sup> KOH as electrolyte:

A mixture of 80 wt% the carbon sample (~ 4 mg), 15 wt% acetylene black and 5 wt% polytetrafluoroethylene (PTFE) binder was fabricated using ethanol as a solvent. Slurry of the above mixture was subsequently pressed onto nickel foam under a pressure of 20 MPa, serving as the current collector. The prepared electrode was placed in a vacuum drying oven at 120 °C for 24 h. A three electrode experimental setup taking a 6 mol L<sup>-1</sup> KOH aqueous solution as electrolyte was used in cyclic voltammetry and galvanostatic charge-discharge measurements on an electrochemical working station (CHI660D, ChenHua Instruments Co. Ltd., Shanghai). Here, the prepared electrode, platinum foil (6 cm<sup>2</sup>) and saturated calomel electrode (SCE) were used as the working, counter and reference electrodes, respectively.

Specific capacitances derived from galvanostatic tests can be calculated from the equation:



where  $C$  (F g<sup>-1</sup>) is the specific capacitance;  $I$  (A) is the discharge current;  $\Delta t$  (s) is the discharge time;  $\Delta V$  (V) is the voltage window; and  $m$  (mg) is the mass of active materials loaded in working electrode.

Specific capacitances derived from cyclic voltammetry tests can be calculated from the equation:

$$C = \frac{1}{mv(V_b - V_a)} \int_{V_a}^{V_b} IdV$$

where  $C$  ( $F g^{-1}$ ) is the specific capacitance;  $m$  (mg) is the mass of active materials loaded in working electrode;  $v$  ( $V s^{-1}$ ) is the scan rate;  $I$  (A) is the discharge current;  $V_b$  and  $V_a$  (V) are high and low voltage limit of the CV tests.

➤ **Measurements conducted in a two-electrode system using [EMIm]BF<sub>4</sub>/AN as electrolyte:**

In a two-electrode cell, [EMIm]BF<sub>4</sub> and acetonitrile (AN) (weight ratio of 1:1) was adopted as electrolyte. A glassy paper separator was sandwiched between two electrodes, and each electrode contains a mixture of 80 wt% the carbon sample (~ 2 mg), 15 wt% acetylene black and 5 wt% polytetrafluoroethylene (PTFE) binder. Nickel foam serves as the current collector. The assembly of the test cell was done in a glove box filled with Ar.

Specific capacitances derived from galvanostatic tests can be calculated from the equation:

$$C = \frac{4I\Delta t}{m\Delta V}$$

where  $C$  ( $F g^{-1}$ ) is the specific capacitance;  $I$  (A) is the discharge current;  $\Delta t$  (s) is the discharge time;  $\Delta V$  (V) is the voltage window; and  $m$  (g) is the total mass of two electrodes.

Specific capacitances derived from cyclic voltammetry tests can be calculated from the equation:

$$C = \frac{2}{mv(V_b - V_a)} \int_{V_a}^{V_b} IdV$$

where  $C$  ( $F g^{-1}$ ) is the specific capacitance;  $m$  (mg) is the mass of active materials

loaded in working electrode;  $v$  ( $\text{V s}^{-1}$ ) is the scan rate;  $I$  (A) is the discharge current;  $V_b$  and  $V_a$  (V) are high and low voltage limit of the CV tests.

Specific energy density ( $E$ ) and specific power density ( $P$ ) derived from galvanostatic tests can be calculated from the equations:

$$E = \frac{1}{8} C \Delta V^2$$

$$P = \frac{E}{\Delta t}$$

where  $E$  ( $\text{Wh kg}^{-1}$ ) is the average energy density;  $C$  ( $\text{F g}^{-1}$ ) is the specific capacitance;  $\Delta V$  (V) is the voltage window;  $P$  ( $\text{W kg}^{-1}$ ) is the average power density and  $\Delta t$  (s) is the discharge time.

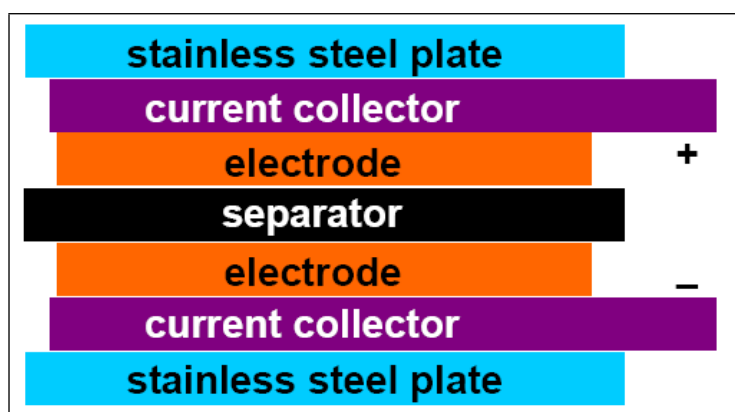

**Fig. S1.** Schematic illustration of a supercapacitor cell.

**Table S1.** Carbon samples obtained under different reaction conditions.

| <b>No.</b> | <b>Samples</b>            | <b>Starting materials<br/>with different mass ratios</b> | <b>Carbonization temperature<br/>/ °C</b> |
|------------|---------------------------|----------------------------------------------------------|-------------------------------------------|
| <b>1.</b>  | <b>Zinc-800</b>           | Zn-complex                                               | 800                                       |
| <b>2.</b>  | <b>Zinc-900</b>           | Zn-complex                                               | 900                                       |
| <b>3.</b>  | <b>Zinc-1000</b>          | Zn-complex                                               | 1000                                      |
| <b>4.</b>  | <b>Zinc metal-1:1-900</b> | zinc metal + Zn-complex (1:1)                            | 900                                       |
| <b>5.</b>  | <b>Zinc metal-2:1-900</b> | zinc metal + Zn-complex (2:1)                            | 900                                       |
| <b>6.</b>  | <b>Zinc metal-1:2-900</b> | zinc metal + Zn-complex (1:2)                            | 900                                       |
| <b>7.</b>  | <b>Mg-800</b>             | Mg-complex                                               | 800                                       |
| <b>8.</b>  | <b>Mg-900</b>             | Mg-complex                                               | 900                                       |
| <b>9.</b>  | <b>Mg-1000</b>            | Mg-complex                                               | 1000                                      |
| <b>10.</b> | <b>Ca-800</b>             | Ca-complex                                               | 800                                       |
| <b>11.</b> | <b>Ca-900</b>             | Ca-complex                                               | 900                                       |
| <b>12.</b> | <b>Ca-1000</b>            | Ca-complex                                               | 1000                                      |
| <b>13.</b> | <b>Al-800</b>             | Al-complex                                               | 800                                       |
| <b>14.</b> | <b>Al-900</b>             | Al-complex                                               | 900                                       |
| <b>15.</b> | <b>Al-1000</b>            | Al-complex                                               | 1000                                      |

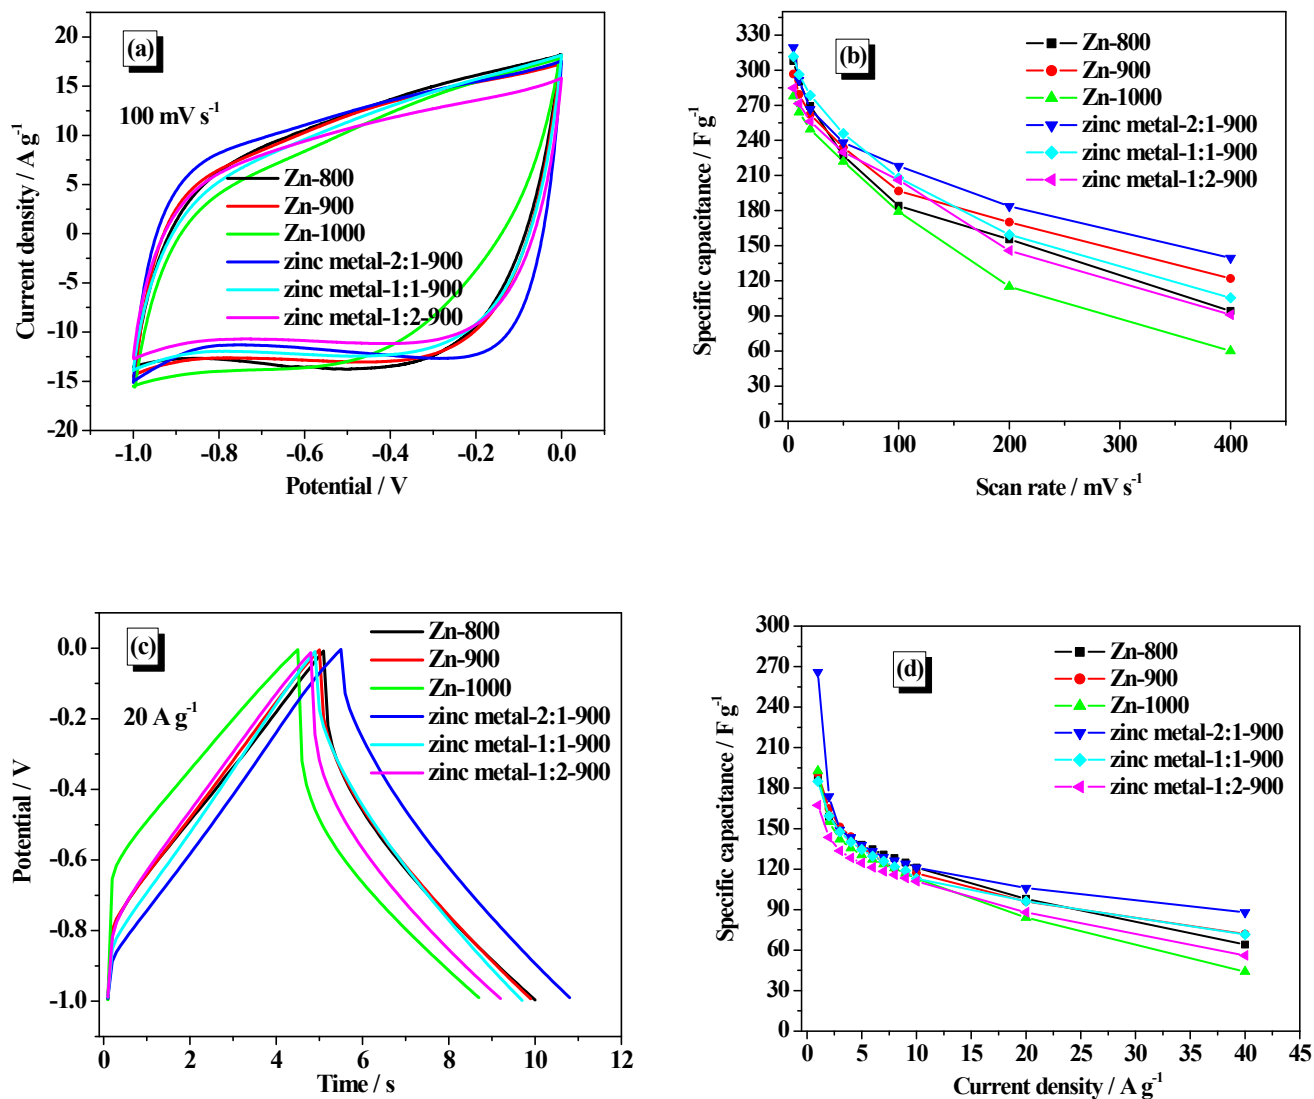

**Fig. S2.** Carbon samples measured in a **three-electrode system** using 6 mol L<sup>-1</sup> KOH as electrolyte: (a) CV curves at a scan rate of 100 mV s<sup>-1</sup>; (b) specific capacitances calculated from CV curves; (c) GCD curves at a current density of 20 A g<sup>-1</sup>; (d) specific capacitances calculated from GCD curves.

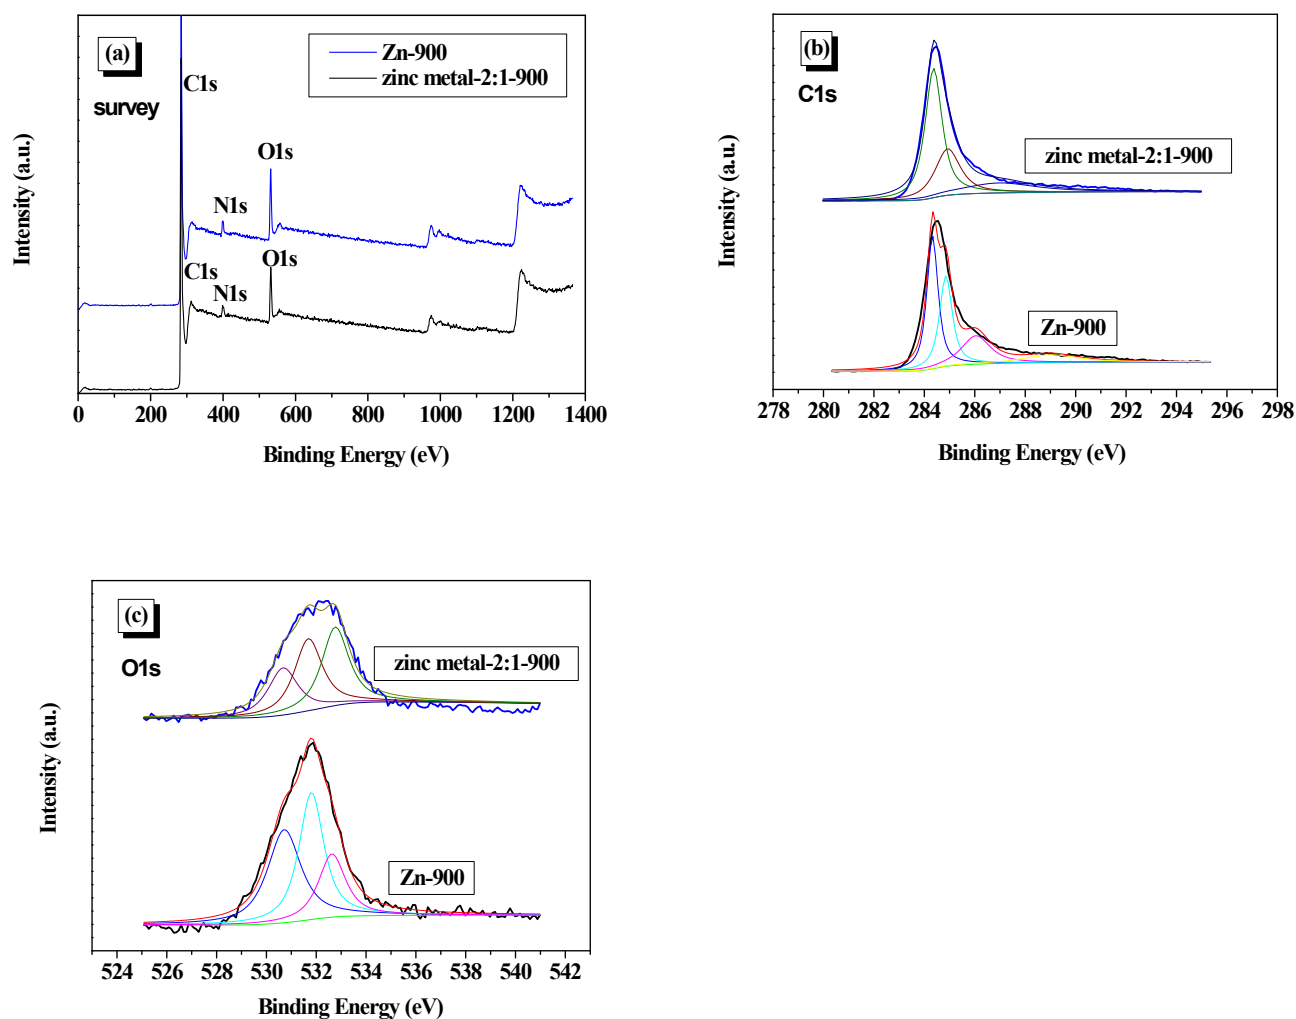

**Fig. S3.** Zn-900 and zinc metal-2:1-900 samples: (a) XPS survey spectra; (b) C1s; (c) O1s.

**Table S2.** XPS peak analysis of the carbon samples.

| <b>Sample</b>             | <b>C (<i>at. %</i>)</b> | <b>N (<i>at. %</i>)</b> | <b>O (<i>at. %</i>)</b> |
|---------------------------|-------------------------|-------------------------|-------------------------|
| <b>Zn-900</b>             | 88.88                   | 3.14                    | 7.98                    |
| <b>zinc metal-2:1-900</b> | 90.08                   | 3.63                    | 6.29                    |



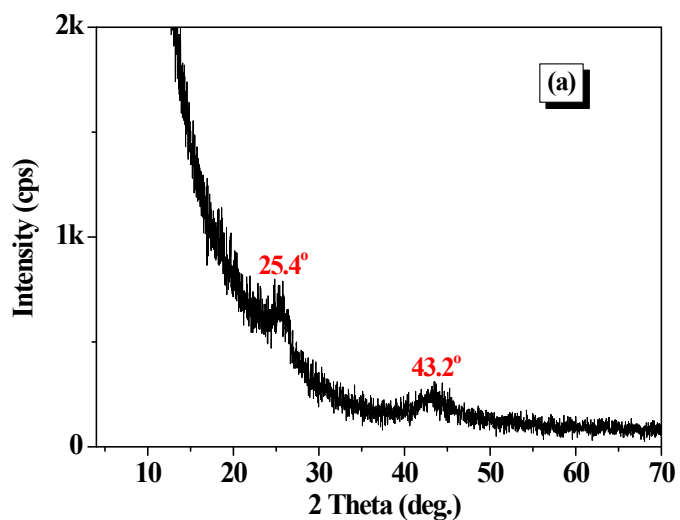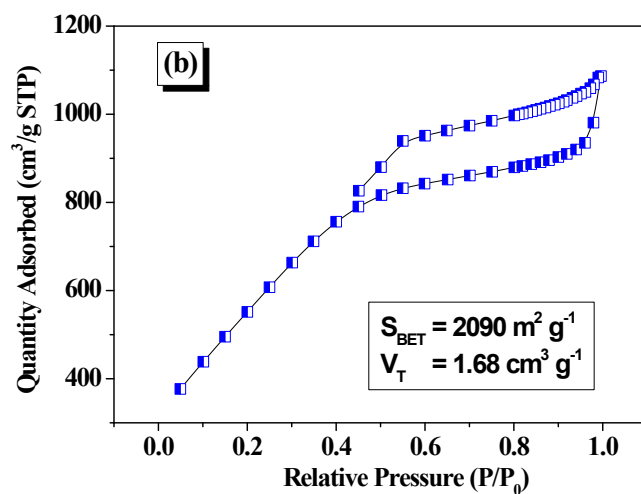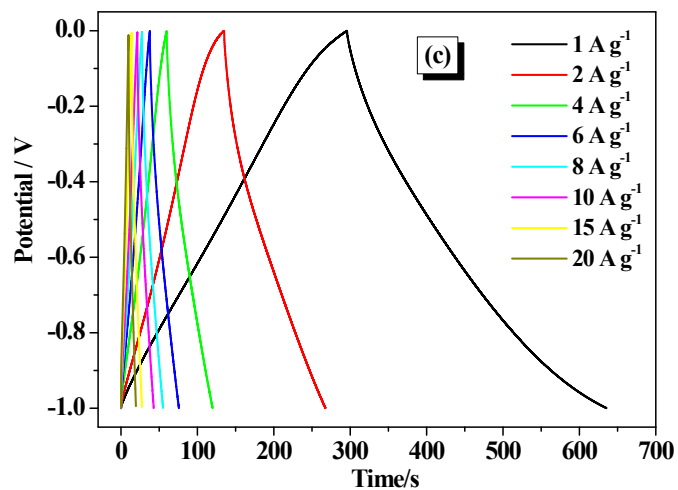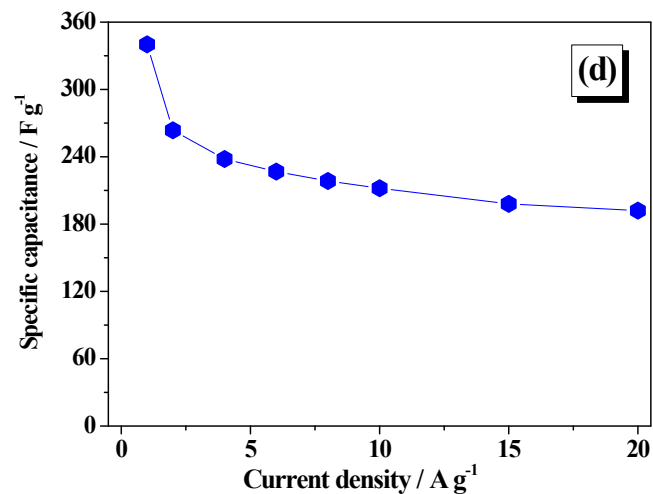

**Fig. S4.** Commercially available activated carbon: (a) XRD pattern; (b) N<sub>2</sub> adsorption-desorption isotherms and pore size distribution; (c) GCD curves at different current densities; (d) specific capacitances calculated from GCD curves.

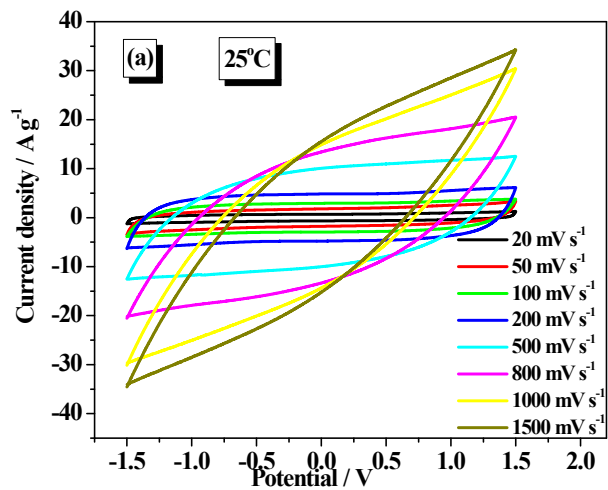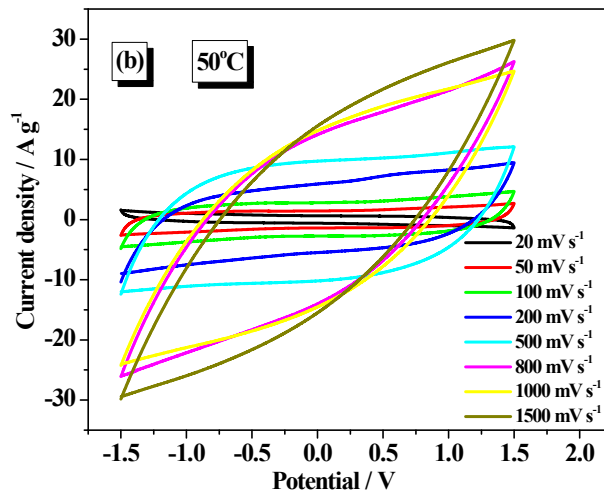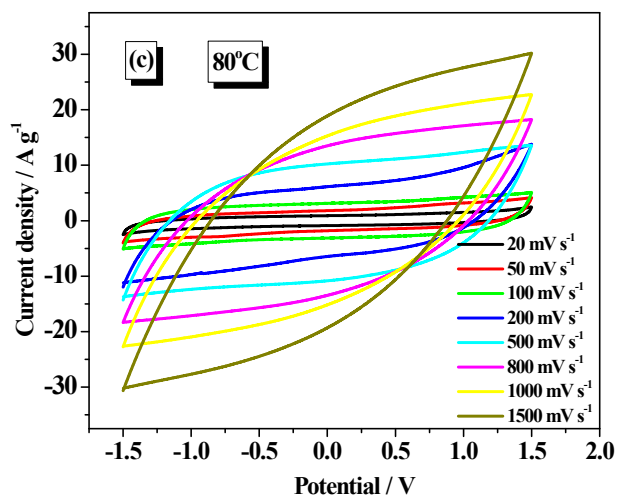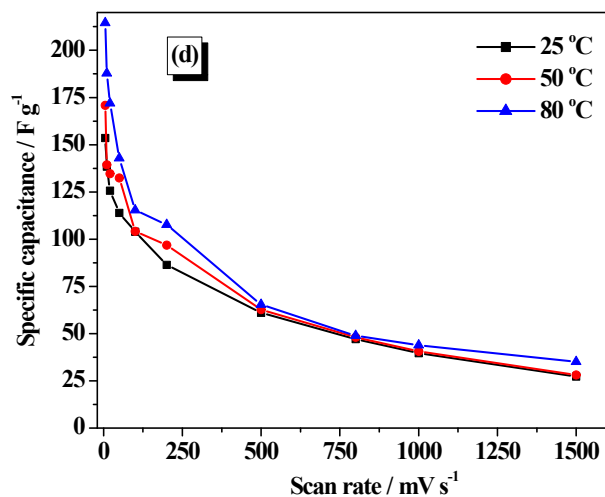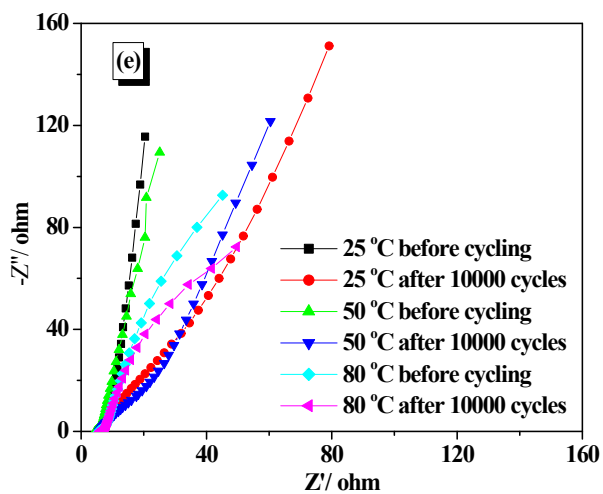

**Fig. S5. Zinc metal-2:1-900** sample measured in a **two-electrode system** using [EMIm]BF<sub>4</sub>/AN as electrolyte at the operation temperatures of 25/50/80 °C: (a-c) CV curves at various scan rates; (d) specific capacitances calculated from CV curves; (e) Nyquist plots before/after 10000 cycles.

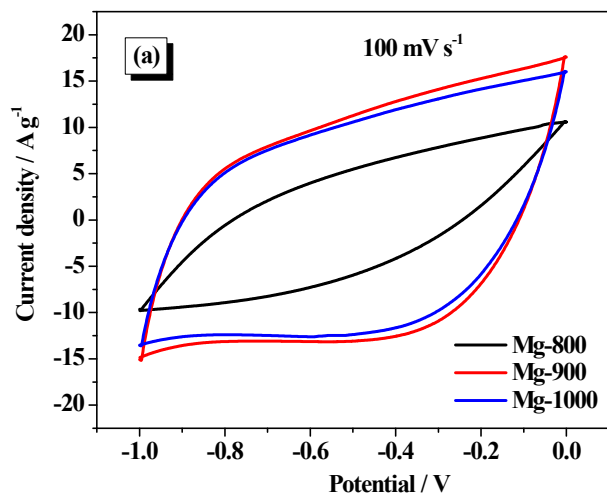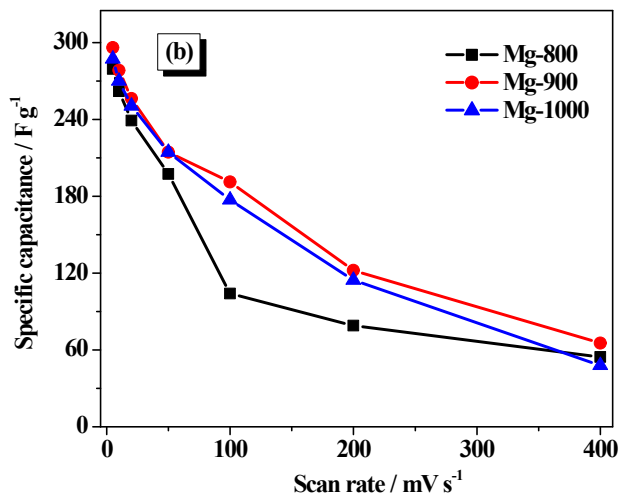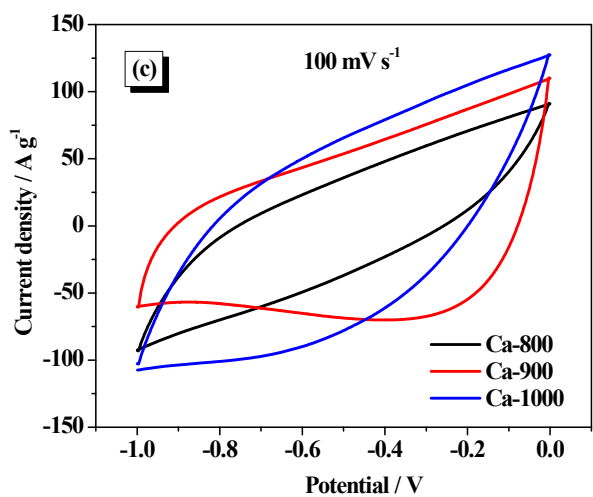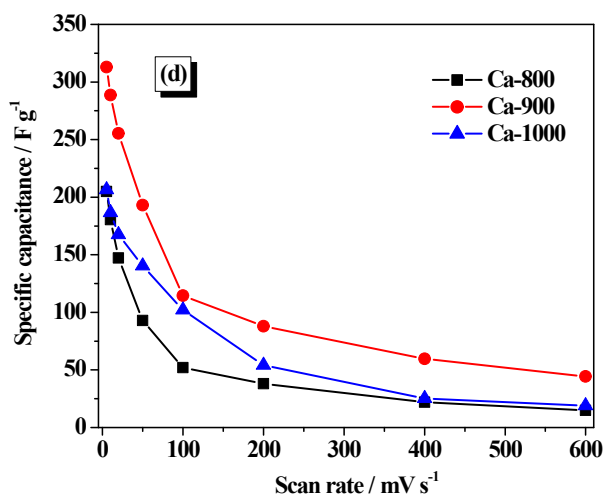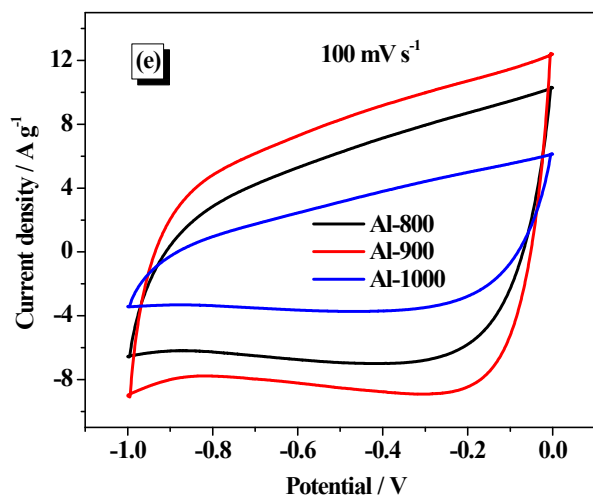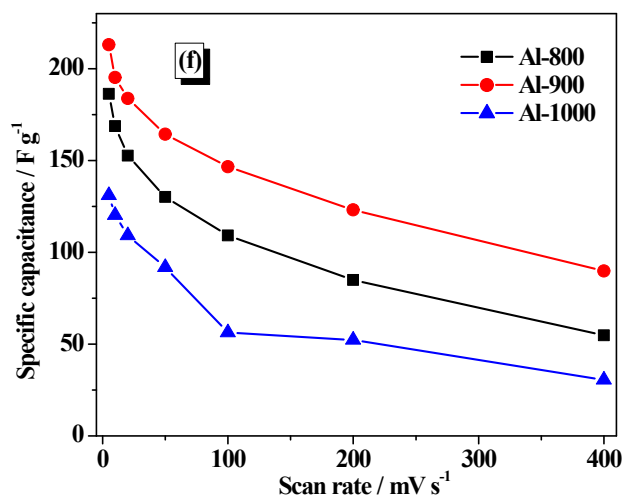

**Fig. S6. Mg/Ca/Al-800/900/1000** samples measured in a **three-electrode system** using 6 mol L<sup>-1</sup> KOH as electrolyte: (a, c, e) CV curves at a scan rate of 100 mV s<sup>-1</sup>; (b, d, f) specific capacitances calculated from CV curves.

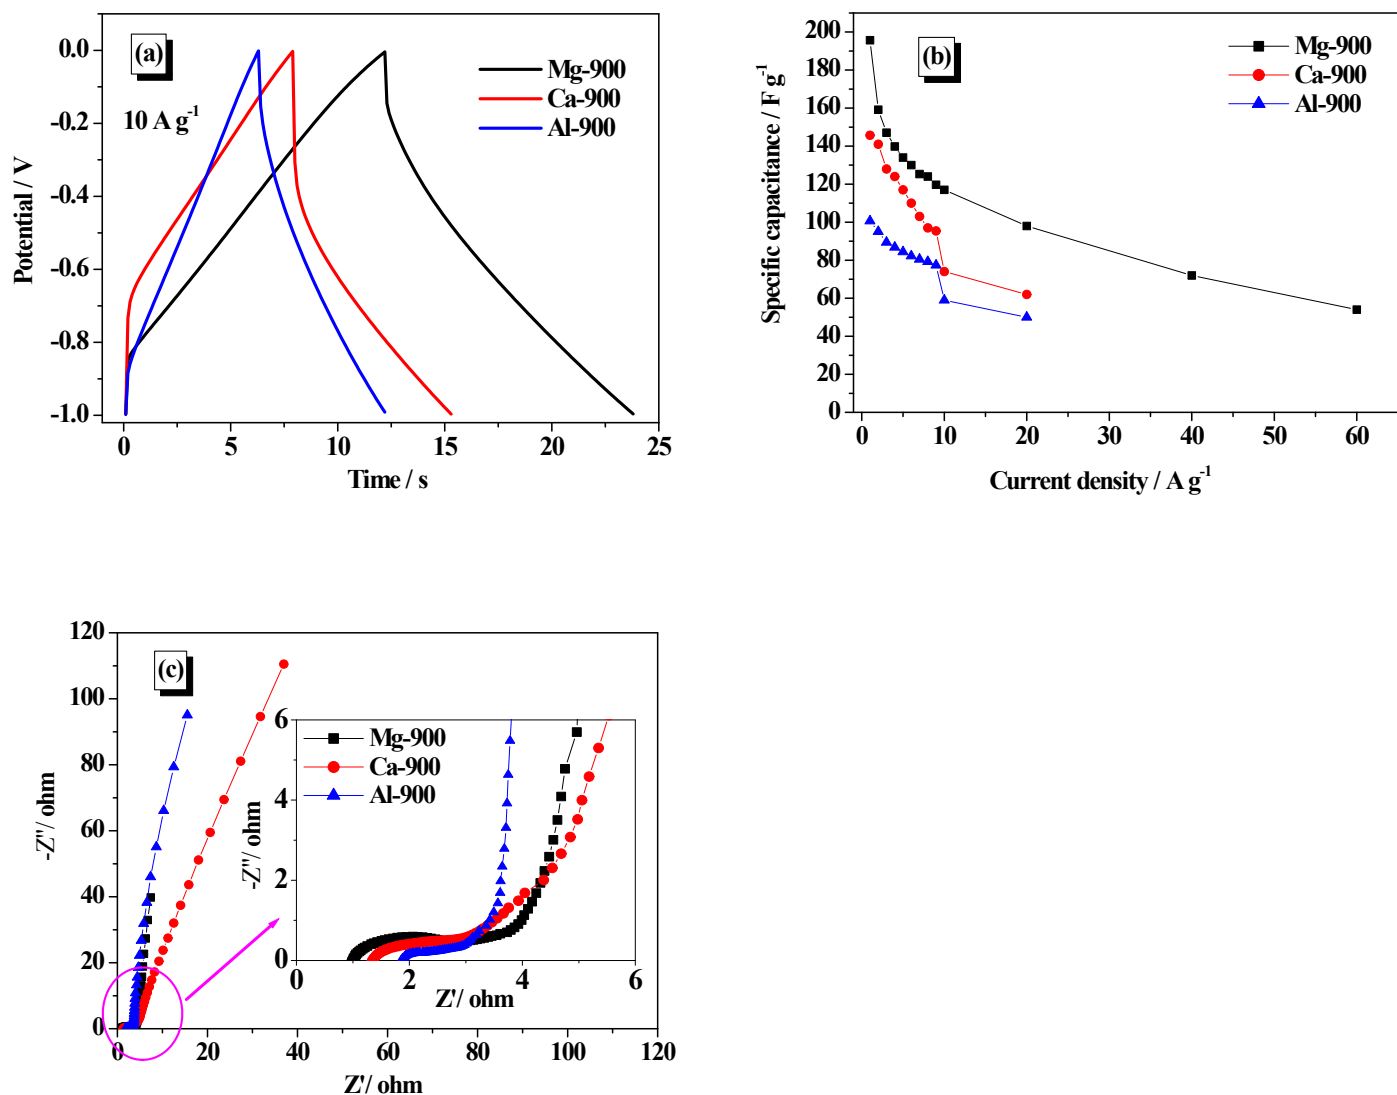

**Fig. S7.** Mg/Ca/Al-900 samples measured in a three-electrode system using 6 mol L<sup>-1</sup> KOH as electrolyte: (a) GCD curves at a current density of 10 A g<sup>-1</sup>; (b) specific capacitances calculated from GCD curves; (c) Nyquist plots after 10000 cycles, as well as the magnified ones (the inset).

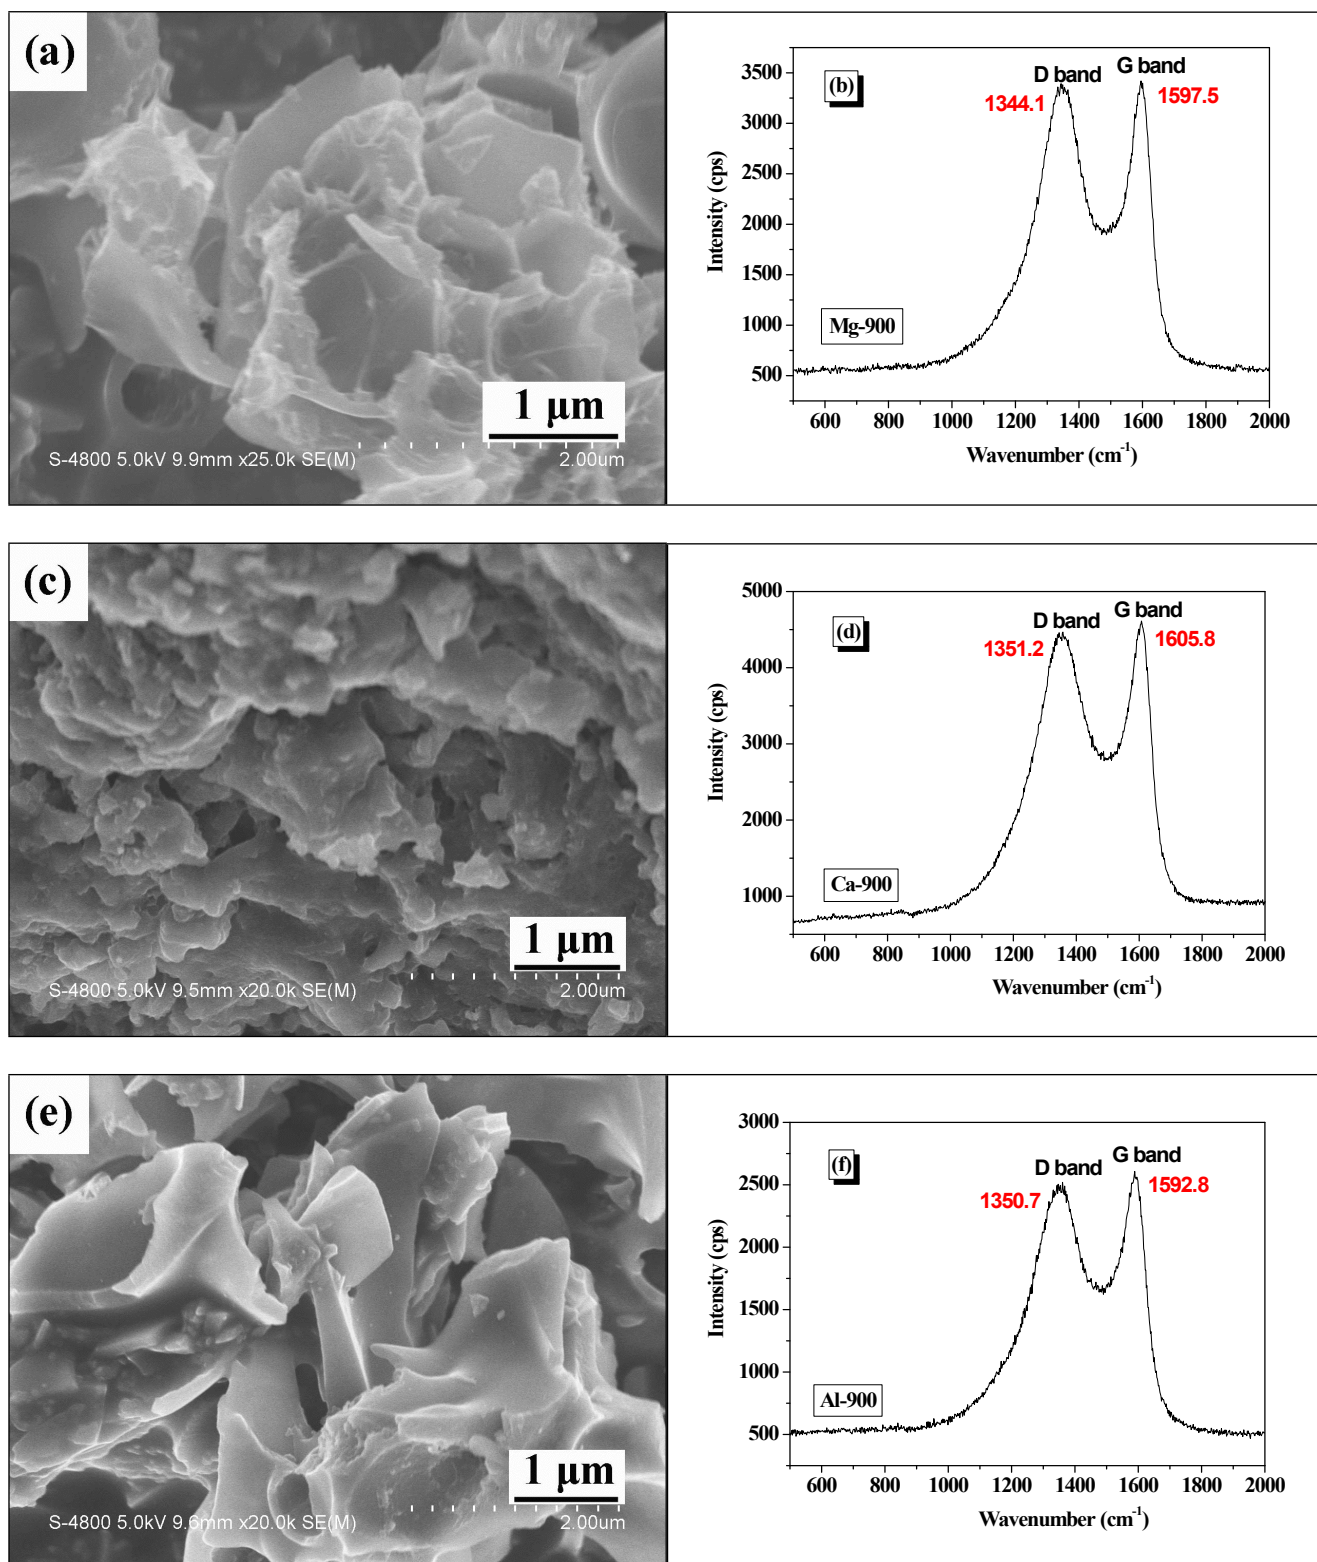

**Fig. S8.** FESEM images and Raman spectra: (a-b) **Mg-900**; (c-d) **Ca-900**; (e-f) **Al-900**.
